# Supplementary material for: FericipXT-coated PEGylated rutile TiO 2 nanoparticles in drug delivery: in vitro assessment of imatinib release
Source: Royal Society of Chemistry journal article supplement (doi:10.1039/d4ra02439g), 2024-01-01
Supplement: d4ra02439g1.pdf [file d4ra02439g1.pdf]

## Figures Legends

Figure 1. XRD of Imatinib (drug), FericipXT tablet (iron supplement) used for coating, rutile TiO<sub>2</sub> NPs (T), FericipXT-coated rutile TiO<sub>2</sub> NPs in the 1:1 ratio (F), PEGylated FericipXT-coated rutile TiO<sub>2</sub> NPs (P), Imatinib-loaded TiO<sub>2</sub> NPs (TD), Imatinib-loaded FericipXT-coated rutile TiO<sub>2</sub> NPs (FD) and Imatinib-loaded PEGylated FericipXT-coated rutile TiO<sub>2</sub> NPs (PD) (*from bottom pattern to the top*).

Figure 2. The FTIR spectra of Imatinib, FericipXT, T, F, P, TD, FD and PD.

Figure 3. Calibration curve obtained for Imatinib under pH (a) 4.4, (b) 7.4 and (c) 9.0.

Figure 4. The UV-Visible absorption spectrum obtained for the drug D, TD, FD and PD at pH (a) 4.4, (b) 7.4 and (c) 9.0.

Figure 5. The HR-TEM images of (a) T, (b) F, (c) P, (d) D, (e) TD, (f) FD and (g) PD.

Figure 6. The SAED pattern obtained for (a) T, (b) F, (c) P, (d) D (e) TD, (f) FD and (g) PD

Figure 7. (a) DLS size distribution plots obtained for T, F, P, TD, FD and PD and (b) Zeta Potential plots of T, F, P, TD, FD and PD.

Figure 8. The VSM curves obtained for (a) T, (b) FericipXT, F and FD, (c) P and PD and (d) FericipXT, FD and PD.

Figure 9. The Imatinib release profiles of T, F and P at pH 4.4.

Figure 10. The Imatinib release profiles of TD, FD and PD at pH 7.4.

Figure 11. The Imatinib release profiles of TD, FD and PD at pH 9.0.

Figure 12. (a) The bar-chart representation of the % hemolysis obtained in all the five samples in comparison with the positive and negative control and (b) the images of all the five blood samples containing the NPs in the respective concentrations, positive control and negative control obtained after centrifugation.

## Tables

Table 1. The symbols used in this report and their meanings.

| Symbol | Meaning                                                                                                         |
|--------|-----------------------------------------------------------------------------------------------------------------|
| D      | Imatinib                                                                                                        |
| FXT    | FericipXT (Iron Supplement)                                                                                     |
| T      | Rutile TiO <sub>2</sub> NPs                                                                                     |
| F      | FericipXT@ rutile-TiO <sub>2</sub> NPs (Iron tablet-coated rutile TiO <sub>2</sub> NPs)                         |
| P      | PEGylated FericipXT@ rutile-TiO <sub>2</sub> NPs (PEG coating onto the iron tablet-coated TiO <sub>2</sub> NPs) |
| TD     | Imatinib (Drug) loaded onto rutile-TiO <sub>2</sub> NPs                                                         |
| FD     | Imatinib (Drug) loaded onto FericipXT@rutile-TiO <sub>2</sub> NPs                                               |
| PD     | Imatinib (Drug) loaded onto PEGylated FericipXT@rutile-TiO <sub>2</sub> NPs                                     |

Table 2. Different phases obtained after XRD analysis of FericipXT-coated rutile TiO<sub>2</sub> NPs with 1:1 core:shell ratio and their quantification.

| JCPDS Pattern | Compound Name                                                                             | Quantification | Crystal System |
|---------------|-------------------------------------------------------------------------------------------|----------------|----------------|
| 01-084-0311   | Iron (III) oxide- alpha (Fe <sub>2</sub> O <sub>3</sub> )                                 | 8.9%           | Rhombohedral   |
| 01-089-2428   | Dioxygen-alpha (O <sub>2</sub> )                                                          | 17.8%          | Monoclinic     |
| 01-089-0599   | (Hematite) Iron (III) oxide-alpha (Fe <sub>2</sub> O <sub>3</sub> )                       | 5%             | Rhombohedral   |
| 01-076-1821   | Iron (III) oxide-beta (Fe <sub>2</sub> O <sub>3</sub> )                                   | 24.8%          | Hexagonal      |
| 01-086-1350   | Iron Oxide (Fe <sub>2.937</sub> O <sub>4</sub> )                                          | 1%             | Cubic          |
| 01-080-2186   | Iron oxide-gamma (Fe <sub>21.34</sub> O <sub>32</sub> )                                   | 19.8%          | Tetragonal     |
| 01-089-5894   | (Maghemite Q Iron Oxide) Iron (III) oxide-gamma (Fe <sub>1.966</sub> O <sub>2.963</sub> ) | 22.7%          | Tetragonal     |

Table 3. A description of wavenumbers relating to the FTIR spectra and their corresponding functional groups for all the samples.

| S.No. | Wavenumber (cm <sup>-1</sup> )                                          | Sample ID (in sequence of the wavenumbers mentioned) | Functional Groups                              |
|-------|-------------------------------------------------------------------------|------------------------------------------------------|------------------------------------------------|
| 1     | 3550.83, 3546.26                                                        | D, PD                                                | Stretching vibration of the hydroxyl group O-H |
| 2     | 3475.74, 3463.61, 3463.83, 3462.55, 3470.46                             | D, T, P, TD, PD                                      | Dimeric OH stretch                             |
| 3     | 3414.83, 3429.14, 3425.40, 3434.15, 3414.61, 3431.66, 3416.92, 3414.12  | D, FXT, T, F, P, TD, FD, PD                          | H-bonded OH stretch                            |
| 4     | 3237.05, 3238.17                                                        | D, PD                                                | Normal “polymeric” OH stretch                  |
| 5     | 2920.87, 2917.30, 2915.98                                               | D, FD, PD                                            | Methylene C-H asym./sym. stretch               |
| 6     | 2879.65                                                                 | FD                                                   | Methylene C-H asym./sym. stretch               |
| 7     | 1776.19                                                                 | FD                                                   | C=O stretching                                 |
| 8     | 1617.31, 1638.36; 1622.01, 1637.07; 1619.09, 1637.31; 1617.73, 1637.72; | D, TD, FD, PD                                        | C=C stretching                                 |
| 9     | 1620.90, 1636.22, 1634.89, 1636.59                                      | FXT, T, F, P                                         | C=C stretching                                 |
| 10    | 1466.85, 1452.94, 1449.61, 1462.97, 1452.30                             | D, F, TD, FD, PD                                     | C-H bending                                    |
| 11    | 1420.13, 1425.66, 1418.94                                               | D, P, TD                                             | C-H bending                                    |
| 12    | 1386.88, 1381.78, 1382.41, 1381.65, 1383.43, 1383.00, 1383.85           | D, FXT, T, P, TD, FD, PD                             | C-H bending                                    |

|    |                                                                         |                             |                                                       |
|----|-------------------------------------------------------------------------|-----------------------------|-------------------------------------------------------|
| 13 | 1351.99                                                                 | FD                          | O-H bending                                           |
| 14 | 1312.90                                                                 | D                           | O-H bending                                           |
| 15 | 1282.75, 1297.97,<br>1288.37                                            | D, FD, PD                   | C-O stretching                                        |
| 16 | 1250.80                                                                 | FD                          | C-O stretching                                        |
| 17 | 1223.37                                                                 | D                           | C-O stretching                                        |
| 18 | 1167.39, 1157.86,<br>1156.93                                            | D, P, TD                    | Hydrate                                               |
| 19 | 1117.03, 1122.51,<br>1124.66, 1109.98,<br>1109.59, 1110.41              | FXT, T, F, P, TD, PD        | Secondary or tertiary alcohol C-O stretching          |
| 20 | 1035.04, 1015.35,<br>1029.75, 1056.21,<br>1029.96, 1097.75,<br>1058.29  | D, F, P, TD, FD, PD         | C-N stretching                                        |
| 21 | 903.50, 916.42,<br>945.98                                               | F, P, FD                    | C-H (Bending of aromatic hydrocarbons)                |
| 22 | 803.72, 876.80,<br>878.54, 897.28                                       | D, FXT, F, PD               | C-H (out of plane bending of aromatic hydrocarbons)   |
| 23 | 753.96                                                                  | D                           | C-H (Bending of aromatic hydrocarbons)                |
| 24 | 620.10, 617.44,<br>613.00, 619.31,<br>613.76, 621.13,<br>617.87, 620.01 | D, FXT, T, F, P, TD, FD, PD | Ti-O-Ti bridging stretching mode, Fe-O in case of FXT |
| 25 | 525.57, 507.80                                                          | TD, FD                      | Bending vibrations of O-Ti-O                          |
| 26 | 480.34, 488.83,<br>476.60, 480.83                                       | D, FXT, FD, PD              | O-Ti-O bonding                                        |

Table 4. Hydrodynamic diameter and Polydispersity Index of T, F, P, TD, FD and PD.

| <b>S.No.</b> | <b>Symbol</b> | <b>Hydrodynamic Diameter (nm)</b> | <b>Polydispersity</b> |
|--------------|---------------|-----------------------------------|-----------------------|
| 1            | T             | 466.0 nm                          | 0.005                 |
| 2            | F             | 449.5 nm                          | 0.227                 |
| 3            | P             | 642.2 nm                          | 0.277                 |
| 4            | TD            | 394.5 nm                          | 0.252                 |
| 5            | FD            | 437.4 nm                          | 0.198                 |
| 6            | PD            | 557.2 nm                          | 0.241                 |

Table 5. The terminologies used for studying drug release from different samples under different pH levels.

| <b>pH →<br/>Samples ↓</b> | <b>pH 4.4</b> | <b>pH 7.4</b> | <b>pH 9.0</b> |
|---------------------------|---------------|---------------|---------------|
| <b>TD</b>                 | T4            | T7            | T9            |
| <b>FD</b>                 | F4            | F7            | F9            |
| <b>PD</b>                 | P4            | P7            | P9            |

Table 6. Representation of R<sup>2</sup> values obtained after fitting the data against different models.

| Samples >>                        | F4     | T4     | P4     | F7     | T7     | P7     | F9     | T9     | P9     |
|-----------------------------------|--------|--------|--------|--------|--------|--------|--------|--------|--------|
| pH                                | 4.4    |        |        | 7.4    |        |        | 9.0    |        |        |
| Zero Order Model                  | 0.7129 | 0.7323 | 0.9807 | 0.8166 | 0.8692 | 0.7345 | 0.7475 | 0.2305 | 0.3384 |
| First Order Model                 | 0.9094 | 0.9138 | 0.9655 | 0.8388 | 0.8910 | 0.7647 | 0.7590 | 0.2617 | 0.3770 |
| Higuchi Model                     | 0.9178 | 0.9178 | 0.9178 | 0.9178 | 0.9178 | 0.9178 | 0.9178 | 0.9178 | 0.9178 |
| Hixson-Crowell Model              | 0.8763 | 0.8887 | 0.9894 | 0.8316 | 0.8840 | 0.7548 | 0.7552 | 0.2512 | 0.3639 |
| Weibull Model                     | 0.9533 | 0.9464 | 0.9924 | 0.9682 | 0.9777 | 0.9752 | 0.9805 | 0.8467 | 0.8520 |
| Noyes-Whitney Model               | 0.9094 | 0.9138 | 0.9655 | 0.8388 | 0.8910 | 0.7647 | 0.7590 | 0.2617 | 0.3770 |
| Korsmeyer-Peppas                  | 0.9895 | 0.9950 | 0.9933 | 0.9866 | 0.9887 | 0.9932 | 0.9926 | 0.9953 | 0.9662 |
| Peppas-Sahlin                     | 0.9895 | 0.9950 | 0.9933 | 0.9876 | 0.9894 | 0.9939 | 0.9928 | 0.9953 | 0.9662 |
| 2 <sup>nd</sup> Degree Polynomial | 0.9180 | 0.9570 | 0.9920 | 0.8520 | 0.9800 | 0.9340 | 0.8350 | 0.7620 | 0.8630 |
